# Supplementary material for: First Report of Integrative Conjugative Elements in Riemerella anatipestifer Isolates From Ducks in China
Source: Front Vet Sci. 2019 Apr 24;6:128. doi: 10.3389/fvets.2019.00128 (PMC6491836; doi:10.3389/fvets.2019.00128)
Supplement: Supplementary file 3 [file Table_3.xls]

## Sheet: Features in Riemerella anatipes
Additional file 3: Table S3. ICERanRCAD0179-1 (annotation by PATRIC)
contig_id	feature_id	type	function	nucleotide_sequence	aa_sequence
selected	fig|34085.314.peg.1	CDS	hypothetical protein	atgcggcttactgaaaggcgcaaaatggaggtaaacgaaaacagaggcagattgtgtagaaaaaaacttcaggggaaaatccgtaaaaaaaagaatcaccaaaaggaaaaagacatcaccggaagcgtgaaaagggcaaaccacaacaaaggaagtatgattgtttccgatccgacggaacttgttcagccgggtggcaacaatcattcttcccggtttgtccggctgtgtgtgggcgcctgtttcattcatggggcaggctga	MRLTERRKMEVNENRGRLCRKKLQGKIRKKKNHQKEKDITGSVKRANHNKGSMIVSDPTELVQPGGNNHSSRFVRLCVGACFIHGAG
selected	fig|34085.314.peg.2	CDS	FIG00408583: hypothetical protein	atgacggcaacggcaaatttcagacaaatggcgcaacacatcgggttggcgatatgcggcttgatgatgcgcaccgccttcggggtgttcggcatcctttggggcatcatcagagagattgtaaacggagtgttccgagtggcgataggtgtaatcgtggctatcctttccaccattgccttctttggcttcatcctttggttattcaccctttaa	MTATANFRQMAQHIGLAICGLMMRTAFGVFGILWGIIREIVNGVFRVAIGVIVAILSTIAFFGFILWLFTL
selected	fig|34085.314.peg.3	CDS	FIG00896355: hypothetical protein	atggcaaaaagaaacagcaagacggcagcgcagcagtgcagatattacgaggtggacaacatcttcgtgtatatggtggaaacgtacatcaacggcaattttgaaactttccgaagattgtaccacgaactgaacaaggacgcacggagggatttcatggacttccttctcagcgaggtagagccgacctattggagagagatactgaaacagataatctaa	MAKRNSKTAAQQCRYYEVDNIFVYMVETYINGNFETFRRLYHELNKDARRDFMDFLLSEVEPTYWREILKQII
selected	fig|34085.314.peg.4	CDS	FIG00899057: hypothetical protein	atgaaaggaacagaccatttcaagagaacgatatatatgtacttggaacagcgtgcggaggaagatgcgctatttgcaaagaagtaccgcaaccctgccaagaacatggacgagtgcgtgacccacattctgaactatgtgcagaaaagcggttgcaacggtttcacggacggagagatattcgggcaagccatccactactatgaggaaaacgagatagaggtgggcaaaccgatggactgccaagtggttgtgaaccacgttgtgaaactcacggcagaggaaaaggcggaggcacgtcagaacgctgtccgcaaataccaagaggaggaactccgcaagttgcagaaccgccacagaccgtcagcgagaaaagaaaaccaaccccaaccctcatta…	MKGTDHFKRTIYMYLEQRAEEDALFAKKYRNPAKNMDECVTHILNYVQKSGCNGFTDGEIFGQAIHYYEENEIEVGKPMDCQVVVNHVVKLTAEEKAEARQNAVRKYQEEELRKLQNRHRPSARKENQPQPSLFDLGL
selected	fig|34085.314.peg.5	CDS	FIG00897206: hypothetical protein	atgaaaccgaagaccaagatacagaaagaggtggcaagactttccgccaaccttcgccccatatcagcgacacaaatagattgggcataccgccactgcgttgagcatatcggctaccgcaccaagaaagggaacatcacctgttccgactgcggtcacgagtggcacagcgacagcggactatgcgacacccttgaaggctgcacctgccccaaatgccatgccgaactcaaagtgcaggacacacgcagacgcatctacaaggaaacgcagaatttcagcgtgataaccacctgcaaagggtatcaggtaatccgcgtggcgcaggtcagatgcgagagcaggaaaggcgaaccgatgcgtttctactgccacgaggtcgtgcagcgttggatttca…	MKPKTKIQKEVARLSANLRPISATQIDWAYRHCVEHIGYRTKKGNITCSDCGHEWHSDSGLCDTLEGCTCPKCHAELKVQDTRRRIYKETQNFSVITTCKGYQVIRVAQVRCESRKGEPMRFYCHEVVQRWISPDGKVTDMALLRGFLFCYCDVWALGSDMEVRPHNSLYDDVVARSCAYPKMRILPQLRRNGFKGDFHGISPVRLFKALLSDPRIETLMKGGEIEVMKHFLFNTRTADECWASYLIAKRHKYQIDNLSMWCDYLRMLKKLGQDLRNPKNICPEDFMAAHDNATRKIEAIHEKERAAEQRRWEIERREREQQRQLQRKKDAEDFIANKSKFFGLVITDEEIIVKVLESIDEYYNEGKTQGICVFGSGYYKKADTLILSARIGDEIIETV…
selected	fig|34085.314.peg.6	CDS	FIG00938992: hypothetical protein	atggaagtaagaattgaaagtatgatttgtgtgtgggatgatgcaatccccacgatgttccttgaatttgtgaacctcctcactctcacaacgagtgagggggaattgagaaagagcgtaaaggagtttgccgagaagcacgaacttgacaagtttttcctttacggcttcggctcacaccatttctacctgcaccaacgctacacaagcaaccccgaaatggtgatgaagaacagagttctgtcagtacatttttaa	MEVRIESMICVWDDAIPTMFLEFVNLLTLTTSEGELRKSVKEFAEKHELDKFFLYGFGSHHFYLHQRYTSNPEMVMKNRVLSVHF
selected	fig|34085.314.peg.7	CDS	FIG00404869: hypothetical protein	atgacaacacgaatgaccatcaacggagtaagcacctgcgcggaagcaggtacggagaaatacgagcgtttccaatcgggtatcggaagacgcaggcggacacttgtgcagtacgactaccgccaccccatagacagagaattgttctcttgtgtcaaacccacgttggacgagtgccgagccgcacgggacaagtggctgaacgcaaagaagggaaaggaggacagactatga	MTTRMTINGVSTCAEAGTEKYERFQSGIGRRRRTLVQYDYRHPIDRELFSCVKPTLDECRAARDKWLNAKKGKEDRL
selected	fig|34085.314.peg.8	CDS	FIG00897394: hypothetical protein	atgaacacgacctatcaaacgctgatagtcaagttcagcgaacctatcacggcattggacggtatctttgacgataccggagcgtggggaacggacaccctcaaggggtggatagatgattacgaaagcacacgtttcaccgccaccgacagccatacggcagtcatcacgagcgagtacaatatggaatgtgtgaaagagtggctacaacggcagacccccatttccgaaatgcgagaattttga	MNTTYQTLIVKFSEPITALDGIFDDTGAWGTDTLKGWIDDYESTRFTATDSHTAVITSEYNMECVKEWLQRQTPISEMREF
selected	fig|34085.314.peg.9	CDS	FIG00898899: hypothetical protein	atgatagccaagacgatattacagcagataggcggaaaacgcttcaccgccatgacaggtagccgtgatttcatagatatgggcaacggcttacggatgagccttgcaaggaacaaaacaagtgccaaccgccttgacatcatctatgacgaaggggcagacctctacaatatgcgcttctaccgcaggacgttcagcaaaaagacctttgagtgcaagacaaaggacattgccgtacacgagggtatctattttgatatgctggaggaaatgttcacgatggtgacgggactttacacacgcttttga	MIAKTILQQIGGKRFTAMTGSRDFIDMGNGLRMSLARNKTSANRLDIIYDEGADLYNMRFYRRTFSKKTFECKTKDIAVHEGIYFDMLEEMFTMVTGLYTRF
selected	fig|34085.314.peg.10	CDS	FIG00407972: hypothetical protein	atgaagaaagtatttaggaaaattcagaaaggaacaacaaaaatgattgaacgtatcaaatcgttgggggaaatggagacgaagcagaaatgtgtagttcaacggttcgagattatcattcccctccaccaaaaaataacgacccaatatatagcctccgcaagttttacttgcggattttttagttatcgcagattggacaaaggtttctttgctactttctttgtccgccatcatgctcactga	MKKVFRKIQKGTTKMIERIKSLGEMETKQKCVVQRFEIIIPLHQKITTQYIASASFTCGFFSYRRLDKGFFATFFVRHHAH
selected	fig|34085.314.peg.11	CDS	Lysozyme (EC 3.2.1.17)	atgatgcgtgtattcatgacaatgctctgttcacttctgacggtctgttctgtgtccgcgcagatcagccgccaagagggaacggacgggcaggcggcaatctaccgactgccgcttatggaacgtgcttttttatgctgccgctactttgaaggctggcactcagaaaaacactacccatacgtcggttggggtcacaaacttttgccaaacgagaagtattcggcacgaaccatgacaaaacgggatgcggatgaacttttgcggaaagacctgcgcaaatttgtcgccatgttccgtaaattcggggttgattcgattttgcttggcacgttagcttacaatgtgggaccggcgaagctgttaggcagcaaaacaatccccaaaagcaccttaatc…	MMRVFMTMLCSLLTVCSVSAQISRQEGTDGQAAIYRLPLMERAFLCCRYFEGWHSEKHYPYVGWGHKLLPNEKYSARTMTKRDADELLRKDLRKFVAMFRKFGVDSILLGTLAYNVGPAKLLGSKTIPKSTLIKKLEAGDRNIYREYIAFCNYKGKRHAMLLKRRKAEFALLYIP
selected	fig|34085.314.peg.12	CDS	Conjugative transposon protein TraQ	atgaacatactgaacaacagaaacaagagaacatcaatattcaaggcagtggcgttatgcctgatagccgccatgtcattcaccctcgtgtcatgtgacgatgacatggacatccagcagtcctatcccttcacggtggaggtcatgcccgtgccgaacaaggtagtaaaggggcagacagtggaaatccgctgtgaactgaaaaaggagggcgacttttcgggtacgctctataccatccgctatttccagttcgagggggaaggctcgctcaaaatggataacggcatcaccttcctgcctaacgaccgctacctgctggagaacgaaaaattccgcctgtactacacggcggcgggtgatgaggcgcataatttcatcgtggtggtggaggataac…	MNILNNRNKRTSIFKAVALCLIAAMSFTLVSCDDDMDIQQSYPFTVEVMPVPNKVVKGQTVEIRCELKKEGDFSGTLYTIRYFQFEGEGSLKMDNGITFLPNDRYLLENEKFRLYYTAAGDEAHNFIVVVEDNFSNSYELEFDFNNRNVKDDDLTIVPIGNFSPLLK
selected	fig|34085.314.peg.13	CDS	DNA primase, TraP-type	atggaaaggacggaaatagatgctgtcagaaggatgccgcttgcggattttctcgcacggctggggcatgagcctgtcagaaggagcggtaacgagctgtggtatcttgccccgtacaggggcgagcgcacatcctctttccgtgtgaacgtggcgaaacagctctggtacgacttcggtttgggcaagggcggcgacatcttcacgcttgccggggagtttctgcaaagcgatgacttcatgaagcaagcgaagttcatagcggaagccgccaatatgacggttgccggatgggaaaagcccgtctatctctcgaagccgaccgaatccgtttttgaggatgtggaggtcgctccgctgctccgctcactgctgacggagtatttagaggaacggggc…	MERTEIDAVRRMPLADFLARLGHEPVRRSGNELWYLAPYRGERTSSFRVNVAKQLWYDFGLGKGGDIFTLAGEFLQSDDFMKQAKFIAEAANMTVAGWEKPVYLSKPTESVFEDVEVAPLLRSLLTEYLEERGIPYAIASRHCCRLNYGVRGKRYFAVGFPNMAGGYEVRSRYFKGCIPPKSVSLVKANDIPADECLVFEGFMDFLSAVTLGVTGNADCLVLNSVANVEKAAGLLDGYGRIGCFLDRDEAGRRTLAALTMRYGERVTDRSSLYDGCKDLNEYLQLTTKKQKNNHLKIEEQ
selected	fig|34085.314.peg.14	CDS	Conjugative transposon protein TraO	atgagaaagtacatcgcaataatcatcgcgtcgcttgccctttttacagggcaggcgcacgcccagcggtgtctgccgaagatgcagggcatcgaggtgagggcggacatggcggacggcttcaatctcggcggcaaggacggcgggtacagcttcggggcggctctctccacctacacgaagaaggggaacaagtgggtgttcggtggcgaatacctgttgaagaacaatccctacaaggacaccaagatacccgtggcgcagttcacggcggagggcggctattacttcaagatactgtcggacgcccgaaagattgttttcgtctatgccggggcttcggctctcgccggatatgaggcggtaaattgggggaagaaggtgctgcatgacggctcc…	MRKYIAIIIASLALFTGQAHAQRCLPKMQGIEVRADMADGFNLGGKDGGYSFGAALSTYTKKGNKWVFGGEYLLKNNPYKDTKIPVAQFTAEGGYYFKILSDARKIVFVYAGASALAGYEAVNWGKKVLHDGSTLHDRDAFIYGGALTLDVECYVADRIALLANLRERCLWGGDTRKFHTQFGVGIKFIIN
selected	fig|34085.314.peg.15	CDS	Conjugative transposon protein TraN	atgagaaaagtaatcatcatgtttgccctcgctatgggcatcataactgccaacgcgcaggagaatgtaaccgttgaaacgaccaacggaagtgaacaaccgaccttgacgaaggaggtctatccgcagaaggaggcggacggcgacctatatcacgggctgtcacgcaagctgaccttcgaccgcatgataccgccgcacggtctggaagtgacctacgacaagaccgtccacgtcatttttccggcggaggtgcgctatgtcgatttaggctcgcccgacctgattgccgggaaagccgacggagcggagaacatcatccgtgtgaaggctaccgtaaggaattttcccaacgaaacgaatatgtccgtcatcacggaggacggcagtttctacacc…	MRKVIIMFALAMGIITANAQENVTVETTNGSEQPTLTKEVYPQKEADGDLYHGLSRKLTFDRMIPPHGLEVTYDKTVHVIFPAEVRYVDLGSPDLIAGKADGAENIIRVKATVRNFPNETNMSVITEDGSFYTFNVKYAAEPLLLNVEMCDFIHDGSTVNRPNNAQEIYLKELGSESPMLVRLIMKSIHKQNKREVKHIGCKRFGIQYLLKGIYTHNGLLYFHTEIKNQSNVPFDVDYITWKIVDKKVAKRTAVQEQIILPLRAQNYATLVPGKKSERTVFTMAKFTIPDDKCLVVELNEKNGGRHQSFVIENEDLVRAGTINELQVR
selected	fig|34085.314.peg.16	CDS	Conjugative transposon protein TraM	atggaacagacaaagaatgaaccgacgaaagagaacaaagctgctcccgaaacggggaaaccgaaaaaggagcgcgaaccgctgacagaggcgcaacggctgaaacggcagaagatgatcgtgctgcccgctatggtgttggtgttcatcggggcgatgtggctgatattcgccccgtcctccggcaaggagcaaccgccgggaacggacggatacaacaccgagatgcccgacgctgacaaggcgaaccggcagattatcggcgacaagctgaaagcctacgagcatggggagatggaagagcgtcaggagagccgcaaccgtgccatcgggcagctgggcgacatgttcgaccgcgagatagcgggaacggagaacggagtggacttcgacctcgcc…	MEQTKNEPTKENKAAPETGKPKKEREPLTEAQRLKRQKMIVLPAMVLVFIGAMWLIFAPSSGKEQPPGTDGYNTEMPDADKANRQIIGDKLKAYEHGEMEERQESRNRAIGQLGDMFDREIAGTENGVDFDLANPGGKEERAKPATPQTIQSSAAAYRDLNATLGNFYDQPKNDNAEMDELLERIASLESELESERGKASSMDEQVALMEKSYELAAKYMGGQNGGQPSAEQRAEPTTVQKGKKNKAMPIRQVEHQVVSSLSQPMSNAEFVAALSQERNRGFNTAVGTAEVLDRNTIPACVHGAQSVTDGQTVRLRLLEPMAVAGRTIPRGAVVVGTGKIQGERLDIEITSLEYDGTIIPVELAVYDTDGQPGIFIPNSMEMNAVREVAANMGGSLGSS…
selected	fig|34085.314.peg.17	CDS	Conjugative transposon protein TraL	atgaaaagtatcagaaaatcaatgtggggcatgtattggaaactccacgacaaacggaaacgcttggcggcaagtctcaaagggtatctggacggcttgccgccggaaacacgccgccgcatcgtgctggggatgttcgccgccttcgcggtgcttgccctttacaccttcggcagagccgtctatgacatcggcaggaacgacggctcacatatggaaacgggacacgccggacgggtggaactgccgaccccggcggaaacaggcaatcacttaacaccttatttatatggaacagacaaagaatga	MKSIRKSMWGMYWKLHDKRKRLAASLKGYLDGLPPETRRRIVLGMFAAFAVLALYTFGRAVYDIGRNDGSHMETGHAGRVELPTPAETGNHLTPYLYGTDKE
selected	fig|34085.314.peg.18	CDS	Conjugative transposon protein TraK	atggaattcaaatcacttagaaacatcgaatcgtcgttcaggcagatacgcctgttcggtatcgtcttcctctcgctgtgcgccgtggtgacggtgtggagcgtgtggaactcctaccgtttcgcagagaagcaacgggagaaaatctatgtgctggacaacggcaagagcctgatgctcgccttgtctcaggatttgtcgcagaaccgcccggcggaggcacgggaacatgtgcgccgtttccacgagatgttcttcacgctatcacctgaaaaaagcgcgattgaacacaacgtgaaacgtgccttgctgctggcggacaagagcgtgtaccactattattcggacttcgcggagaaggggtactacaaccgcatcatcgccgggaacatcaaccaa…	MEFKSLRNIESSFRQIRLFGIVFLSLCAVVTVWSVWNSYRFAEKQREKIYVLDNGKSLMLALSQDLSQNRPAEAREHVRRFHEMFFTLSPEKSAIEHNVKRALLLADKSVYHYYSDFAEKGYYNRIIAGNINQVLKVDSVVCDFNAYPYRAVTYATQKIIRQSNVTERSLVTTCRLLNASRSDDNPNGFTIEGFTIIENKDLQTIKR
selected	fig|34085.314.peg.19	CDS	Conjugative transposon protein TraJ	atgaagttcgacaaccttcatcagattttacgttcactttatgagcagatgatgccgctgtgtggggacatggctggtgtggcgaaaggcatcgccgggctgggtgcgctgttctacgtcgcctaccgggtatggcagtcgctggcgagagctgaaccgatagacgtattcccgatgctccgtccttttgccatcggtctgtgcatcatgttcttcccgactgtggtgctgggcacgataaacagcatcctctcacccgtcgtacagggcacggcaaagatgctggaggcggaaacgctggacatgaaccgataccgggagcagaaggacaaactggaatacgaggcgatggtacgcaaccccgaaaccgcctacctcgtgtccaacgaggaatttgac…	MKFDNLHQILRSLYEQMMPLCGDMAGVAKGIAGLGALFYVAYRVWQSLARAEPIDVFPMLRPFAIGLCIMFFPTVVLGTINSILSPVVQGTAKMLEAETLDMNRYREQKDKLEYEAMVRNPETAYLVSNEEFDKQLEELGWSPSDMVTMAGMYIDRGMYNMKKSIRDFFREILELLFQAAALVIDTVRTFFLVVLAILGPIAFALSVWDGFQNTLTQWICRYIQVYLWLPVSDMFSTILAKIQVLMLQNDIERMQADPNFSLDSSDGVYIVFLCIGIIGYFTIPTVAGWIIQAGGMGGYGRNVNQMAGRAGSMAGSVAGAAAGNAVGRVGKLLK
selected	fig|34085.314.peg.20	CDS	Conjugative transposon protein TraI	atgagaacaagaataacaatgattatctgcctgtgcctgcttttcgcgggcagggcaagcgcacagtgggtcgtaagcgatccgggcaatctagcgcagggcatcatcaatgcctccaaaaacatcatccatacctccaagaccgccacgaacatggtgagcaactttcaggagacggtgaaaatctatcagcagggcaagaagtattacgatgccctcaaatcggtgaacaatctggtcaaggacgcccgcaaggtgcagcagaccatcctgatggtgggcgacatcacagacatctatgtgaacagtttccaacggatgctccgtgacgggaatttcagacccgaagagctttccgcaatcgctttcggctacacgaaactgctggaggaaagcaac…	MRTRITMIICLCLLFAGRASAQWVVSDPGNLAQGIINASKNIIHTSKTATNMVSNFQETVKIYQQGKKYYDALKSVNNLVKDARKVQQTILMVGDITDIYVNSFQRMLRDGNFRPEELSAIAFGYTKLLEESNEVLTELRNVVNITTLSMTDKERMDVVERCHSKMKRYRNLVSYYTNKNISVSYLRAKKKNDLDRIMGLYGNMNERYW
selected	fig|34085.314.peg.21	CDS	Conjugative transposon protein TraH	atgaatttaccaaaagtgaaaatgctgcaagtcagcaagtgccttatcggattggcggtcatgatgctgcaatcctgcgacgtggccgacaaccgccgcgacatgctgtgcgggaactgggagagcgtggagggaaaacctgacgtgcttatctacaaggagggcgaagcctacaaagtgacggtgttccgtcgtagcggtctgcgccgcaagctcaagccggaaacctatctcttgcaggaggagaacggcaacctgttcatgaacaccggcttccgcatcgacgtgtcctacaacgaggccacggatgtgctgactttctcgccaaacggggactatgtgcgggtgaagccgcagccgggacatccgaccgaagaataa	MNLPKVKMLQVSKCLIGLAVMMLQSCDVADNRRDMLCGNWESVEGKPDVLIYKEGEAYKVTVFRRSGLRRKLKPETYLLQEENGNLFMNTGFRIDVSYNEATDVLTFSPNGDYVRVKPQPGHPTEE
selected	fig|34085.314.peg.22	CDS	Conjugative transposon protein TraG	atgaggaatacatcgaaaatgacaacactggaaaacaggttcccacttttagcggtggagcatggctgcatcatctcaaaggacgccgacatcacggtggctttcgaggtggaactaccggaactttacaccgtgacgggtgcggagtacgaggcgatacacagttgctggtgcaaggctatcaaggtgctgccggactactccgtcgtccacaaacaggactggttcatcaaggaacgctacaaaccggagcttcagaaggacgacatgagctttttaagccgctctttcgagcgtcacttcaacgagcgtccgtacctgaaacacacctgctacctctacctgaccaagacaacaaaggagcgtaaccggatgcagagcaatttcagcacgctgtgc…	MRNTSKMTTLENRFPLLAVEHGCIISKDADITVAFEVELPELYTVTGAEYEAIHSCWCKAIKVLPDYSVVHKQDWFIKERYKPELQKDDMSFLSRSFERHFNERPYLKHTCYLYLTKTTKERNRMQSNFSTLCRGHIIPKELDRETTTKFLEACEQFERIMNDSGLVRLRRLSTDEIVGTEGKTGLIERYFSLMPEGDTTLQDIELSAREMRIGDNRLCLHTLSDAEDLPGKVATDTRYEKLSTDRSDCRLSFASPVGLLLSCNHIYNQYVLIDNSEETLQKFEKSARNMQSLSRYSRSNSINREWIDQYLNEAHSYGLTSVRAHFNVMAWSDDAEELKHIKNDVGSQLASMECVPRHNTIDCPTLYWAAIPGNAADFPAEESFHTFIEQAVCLFTEET…
selected	fig|34085.314.peg.23	CDS	Conjugative transposon protein TraF	atggctgaatacccaatcaacaagggtatcggccgtccggtagagttcaagggcttgaaggcacagtacctcttcatcttctgcggaggtctgctggctctcttcgtcctgttcgtcatcctctacatggtcggtatcgaccagtggatatgtatcggcttcggcgcggcatcgtcctccctccttgtatggcagaccttcgcgctgaacgcccggtacggtgaacacgggctgatgaaattaggagcggcacggagccatccccgataccttatcaaccggcggcggataacccgtctgttcaaacgacaacgaaaggaagaaagacaatga	MAEYPINKGIGRPVEFKGLKAQYLFIFCGGLLALFVLFVILYMVGIDQWICIGFGAASSSLLVWQTFALNARYGEHGLMKLGAARSHPRYLINRRRITRLFKRQRKEERQ
selected	fig|34085.314.peg.24	CDS	Conjugative transposon protein TraE	atgaacaagaacatcttgaaaaacagaaaagcaatcctctccgcggcacttgtcatcgccgcaaccgcctccgctttcgcgcagggaaacggcatcgcgggcatcaacgaagccacctctatggtgagttcttatttcgaccccggaactaaactgatatacgccatcggtgcagtcgtcgggcttatcgggggcgtaaaagtgtacggcaagttttcatcgggcgaccccgacaccagcaagacagccgcctcgtggttcggcgcgtgcatcttcctgattgttgccgccaccatcctgcgctcattcttcctttaa	MNKNILKNRKAILSAALVIAATASAFAQGNGIAGINEATSMVSSYFDPGTKLIYAIGAVVGLIGGVKVYGKFSSGDPDTSKTAASWFGACIFLIVAATILRSFFL
selected	fig|34085.314.peg.25	CDS	hypothetical protein	atgtatgacaacaataaaagaaatgaacatgaaagaatgacatcaacccacgcggcgaggaaacgcaaggcgcatccccatccgcaacggacacgcccacgtccgtggaaacaaacgggcatccactaa	MYDNNKRNEHERMTSTHAARKRKAHPHPQRTRPRPWKQTGIH
selected	fig|34085.314.peg.26	CDS	Conjugative transposon protein TraD	atgaattacacaatcagcatgacagacattctgctggcggtatcggtcggctgcaacctctggttcctgttcctgctcctttacgagcgcatcatggacacgcggattgtccgcttcttcaagggcattgtcggattatggcggtcactggacgggaatgaggctaaacgcatagcggcacacgaggaagtccctgcggaaaaggcggacatcatcggcaagagccgtttcaggatggcatccacccggacaaccgctgccataccgacgcaagaagccgccactattgaaaaaggcattgagctgtcggaggaagaggctacttttgacgacggaaaaacgggaaacgcatcccgcccggcacaagtcccggaggaaaaactcgatgagaccttcacg…	MNYTISMTDILLAVSVGCNLWFLFLLLYERIMDTRIVRFFKGIVGLWRSLDGNEAKRIAAHEEVPAEKADIIGKSRFRMASTRTTAAIPTQEAATIEKGIELSEEEATFDDGKTGNASRPAQVPEEKLDETFTSIPPEELGYGDDEPEEDASDTPRASGSSFDEIDDACKTAKNPDATQAEREKAAKVFTDMEGTELYEKMMEGSSEIGIRIKGLIEIRLKKSEKEFVVPDNIEEFDIRNYV
selected	fig|34085.314.peg.27	CDS	Conjugative transposon protein TraC	atggaaaaagaaatgacaccgaatgaaaaaagaccacagcaagactgcggaggtatgtttacccaagtgcaggcgagtgtggaaatactgtcgcctgtcccggtaagcggcaaatgcagtgagaaggactatgaacgcctgttcatccgcgacccggaagtaaaggcacgtgaggggaagatggcgtatgtgcgcccggagtaccacgagcgtatcatgcgtatcacccgtgtaatcgggcatgaccggcttacgctgtccgcttacatcgaccatgtgctgacgcaccacttcaaccagtgcgaagatgcgataaagagcctttatgcccgaaattacaattcagtattctaa	MEKEMTPNEKRPQQDCGGMFTQVQASVEILSPVPVSGKCSEKDYERLFIRDPEVKAREGKMAYVRPEYHERIMRITRVIGHDRLTLSAYIDHVLTHHFNQCEDAIKSLYARNYNSVF
selected	fig|34085.314.peg.28	CDS	Conjugative transposon protein TraB	atgggcagcaggaaagtgaacacggaaggcatcgacgaggaactgctgttagcctccatcgggcggcgcacacaggacgggacactgcgccccgcacaggaagtacccgcagctgcaccgaccgaagaggacaccgccgcaccggaaccatctcctgtgcaacccgtaacacgggaaaaagcgcagagggaaagtggacgccggaaaaggcaggacgaggactacaacgagctattcctgcgccgcaacgagataaagacccgccaatgtgtctatatcagccgtgacgtccacggcaagatcctcagaatcgtgaacgacatcgccggaggggaaatctcagtaggcggatatgtggataccgtgctgcgccagcatctggaacagcacaaggagaga…	MGSRKVNTEGIDEELLLASIGRRTQDGTLRPAQEVPAAAPTEEDTAAPEPSPVQPVTREKAQRESGRRKRQDEDYNELFLRRNEIKTRQCVYISRDVHGKILRIVNDIAGGEISVGGYVDTVLRQHLEQHKERINELYKKQREDLI
selected	fig|34085.314.peg.29	CDS	Conjugative transposon protein TraA	ttgcagcatgattcaagaaacgaacgatttgaagatatgataaacggaacattcaaatacccggaaatccgcttcttcggatacttgccgaaacggatacccgaaccgtcggaaacccggttctccgacaattcggtgacgtatggattcaatgacttcatgacgcaatgtcgtcaatcaccatttgtccgacgcaccgcttcaccacagaaccggatacgcgacgacccgcctgcgtgtgtagtcacggaagcggatggtgcgacagccaaatccgtatggaaacagaaaaacaaatcatcaacaattaaaataaatggaactatgagtaaggaaatcttcgttgcattcgcaacacagaaaggtggcatcggcaaatccactgtcacggcacttgcc…	MQHDSRNERFEDMINGTFKYPEIRFFGYLPKRIPEPSETRFSDNSVTYGFNDFMTQCRQSPFVRRTASPQNRIRDDPPACVVTEADGATAKSVWKQKNKSSTIKINGTMSKEIFVAFATQKGGIGKSTVTALAASYLHNVKGYNVAVVDCDDPQHSIHGLREHEMGLIDSSTYFKALACDHFRRIKKNAYTIVKSNAVNALDDAERMIATEDVKPDVVFFDMPGTLRSNGVIKTLSQMDYIFTPLSADRFVVESTLKFVTMFRDRLMTTGQAKTKGLHLFWTMVDGRERNDLYGIYEEVIAEMGFPVLSTRLPDSKKFRRDLSEERKSVFRSTIFPMDTALLKGSGIREFSEEISDIIRPK
selected	fig|34085.314.peg.30	CDS	hypothetical protein clusted with conjugative transposons, BF0131	atgaaagagaaaaggaaaagcaaatcagggagaaatcccaaacttgatccggcggtgtaccggtacaccgtccgtttcaacgaggaggaacacaaccgtttcctcgccatgttcggaaaatcgggtgtctatgcacggtctgttttcctcaaagcgcacttcttcgggcaaccgttcaaggtgctgaaggtggacaagacgttggtggactattacaccaaactgtcggattttcatgcacaattccgtgccgtgggtacgaattacaaccaagtcgtgaaggaactgaggctgcatttttcagagaaaaaggcgatggcgttgctctacaaattagagcaacacaccgtcgaactcgtgaaactgagccgccggattgtggaactttcaagggaaatg…	MKEKRKSKSGRNPKLDPAVYRYTVRFNEEEHNRFLAMFGKSGVYARSVFLKAHFFGQPFKVLKVDKTLVDYYTKLSDFHAQFRAVGTNYNQVVKELRLHFSEKKAMALLYKLEQHTVELVKLSRRIVELSREMEAKWSQKSV
selected	fig|34085.314.peg.31	CDS	Putative conjugative transposon mobilization protein BF0132	atggtcgcaaaaatcagtgtaggaagttcgttgtacggcgcgattgcctacaacggggagaagattaacgaggcgcaggggcggcttctcaccaccaaccgcatctacaatgacggttcgggaacggtggacataggcaaggcgatggagggttttctcaccttcctgccaccgcagatgaagatcgagaagccggtggtgcatatctctctcaacccgcacccggaggatgtgctgaccgatattgagttgcagaatatcgcccgcgagtatctggaaaaactcggtttcggaaaccagccttatcttgtattcaagcacgaggacatcgaccgccaccacctgcacatcgtgacggtcaacgtggacgagaacgggaaaaggctcaaccgggatttt…	MVAKISVGSSLYGAIAYNGEKINEAQGRLLTTNRIYNDGSGTVDIGKAMEGFLTFLPPQMKIEKPVVHISLNPHPEDVLTDIELQNIAREYLEKLGFGNQPYLVFKHEDIDRHHLHIVTVNVDENGKRLNRDFLYRRSDRIRRELEQKYGLHPAERKNQRLDNPLRKVAASAGDVKKQVGNTVKALNGQYRFQTMGEYRALLSLYNMTVEEARGNVRGREYHGLVYSVTDDKGNKVGNPFKSSLFGKSAGYEAVQKKFVRSKSEIKDRKLADMTKRTVLSVLQGTYDKDKFVSQLKEKGIDTVLRYTEEGRIYGATFIDHRTGCVLNGSRMGKELSANALQEHFTLPYAGQPPIPLSIPVDAADKAHGQTAYDSEDISGGMGLLTPEGPAVDAEEEAFI…
selected	fig|34085.314.peg.32	CDS	Putative mobilization protein BF0133	atgtcacaacaagaagacgatttgagggcattggcgaaaatcatggattttctgcgtgccgtgagtatcattttagtggtcatgaacgtgtactggttctgctacgaagccatccggctgtggggcgtgaacatcggcgtggtggacaaaatccttctgaacttcgaccgcacggcggggctgttccattccattctctacacgaagctgttttccgtccttttgcttgccttgtcctgtctgggtacgaagggtgtcaagggtgagaaaatcacttgggggagaatctggacagcatttgccgtcgggttcgtgctgtttttcctgaactggtggttgctgcccctgccgctgccgcttgaagcggtgacgggactgtatgtccttaccattggaacg…	MSQQEDDLRALAKIMDFLRAVSIILVVMNVYWFCYEAIRLWGVNIGVVDKILLNFDRTAGLFHSILYTKLFSVLLLALSCLGTKGVKGEKITWGRIWTAFAVGFVLFFLNWWLLPLPLPLEAVTGLYVLTIGTGYVCLLMGGLWMSRLLKHNLMEDVFNNENESFMQETRLIESEYSVNLPTRFYYRKRWNNGWINVVNPFRASIVLGTPGSGKSYAVVNNFIKQQIEKGFSQYIYDFKYPDLSTIAYNHLLNHPDGYKVKPKFYVINFDDPRRSHRCNPIHPDFMEDITDAYESAYTIMLNLNKTWVQKQGDFFVESPIILFASIIWYLKIYQNGKFCTFPHAIEFLNRRYEDIFPILTSYPELENYLSPFMDAWLGGAAEQLMGQIASAKIPLSRMI…
selected	fig|34085.314.peg.33	CDS	FIG00404088: hypothetical protein	atggaaacaaaactacaatccaaacagcaatatccgcggtttatccaaaataaaccgtgtggtattgacaaattcgatggaggttcgcaagaaaggttggcaaaaactattgctcgccatttttgtcagaatgattcattggatgaggaatgtactttacctcgaattatcggcatcgaaggtatttggggatctggaaaatccaacgtggttaaaatgttggaacgtgaattatcagacgactattacttttttgagtatgacgcatggggacatcaagaggacttgcaacgccgctctatattggaattgcttacaagcaaacttattgatgatggtatcctatctggaaatgcaacaataaaagtcaaaggtggaggtacgaaaaccgtatcatgg…	METKLQSKQQYPRFIQNKPCGIDKFDGGSQERLAKTIARHFCQNDSLDEECTLPRIIGIEGIWGSGKSNVVKMLERELSDDYYFFEYDAWGHQEDLQRRSILELLTSKLIDDGILSGNATIKVKGGGTKTVSWSEKLKYLLARKTETVTEKYPLISNGMVAAFLVAVLTPIFTFIAYAVKPTPTTWWFSLLSIIIAALPVLIALCVWKWAYSKDHKYGWSYMLAIYQDKVEKDVCYETLSEDEPTVYEFKTWMQDISDFIKEKGQRKLVLVFDNMDRLPAEKVKELWSSIHTFFADSGFENVWAVIPFDETHLACAFGDETDEQTKQLTKYFINKTFPIVYRVAPPVITDYRSIFNKLFVEAFGETENEAKETINRIFRLVNPNANVREIISYINEMVA…
selected	fig|34085.314.peg.34	CDS	Prokaryotic ATPase	atggaaacagtaaatagaatacttcaagagaagattacagcacgaatcgcgcccaataaagcagtactgatttttggtgctcgccgtgttggtaaaacggtaatgatgcgtaaaattgtggacaactattcaggtaggacgatgatgctcaacggcgaagactacgacacattagcactattggagaatcgctcaatagccaattatcggcatttattggatggtattgatttgctggctattgatgaggcacagaacataccacaaatcggtagtattctgaagttgatagttgatgaaataccgggaataagtgtcttggcaagtggttcttcgtcattcgatttgctgaataagactggtgaaccgttggtcggccgcagtacgcaatttctcctt…	METVNRILQEKITARIAPNKAVLIFGARRVGKTVMMRKIVDNYSGRTMMLNGEDYDTLALLENRSIANYRHLLDGIDLLAIDEAQNIPQIGSILKLIVDEIPGISVLASGSSSFDLLNKTGEPLVGRSTQFLLTPFSQREIAQTETALETRQNLEARLIYGSYPEVVMMENYERKTDYLRDIVGAYLLKDILAIDGLKNSSKMRDLLRLIAFQLGSEVSYEELGKQLGMSKTTVEKYLDLLEKVFVIYRLGAYSRNLRKEVTKAGKWYFYDNGIRNAIIGAFSPLAIRQDVGALWENYIIGERRKANFNEGLHREFYFWRTYDKQEIDLIEESADSLTALEFKWGNKMPAAPKAFQEAYPYAEFHVVNRENYLEFV
selected	fig|34085.314.peg.35	CDS	CTnDOT excision operon activator RteC	atgaattatttcttgctggcggaaaccgactttttccgcctgataaacgaagccggcgactgcaatatggaaacggcatacacggctttcgccacccaagtgatcgaactgtgcaacggcggcatggacatgaaccttaccgtcatcgcgcttgcctacatcgaaatcgagttgcagcaccatcccgtacgtaatctgtcagaagaaaaaagagagattgccgcctacgtcagcaaggctctgtctttcgtaagaaagatgcagaaattccttgccacgccccaagtgccaccactaatatccgccaacaacgcaacagaaaccaccgccagccttcttcaatggacgggcaatgccatcgacctcgtggaacttatctacggcatagacgtgatgggc…	MNYFLLAETDFFRLINEAGDCNMETAYTAFATQVIELCNGGMDMNLTVIALAYIEIELQHHPVRNLSEEKREIAAYVSKALSFVRKMQKFLATPQVPPLISANNATETTASLLQWTGNAIDLVELIYGIDVMGCINNGNMPLKQLAPLLYKIFGVDSKDCYRFYTDIKRRKNESRTYFIDRMQEKLNERMLRDEELERMRK
selected	fig|34085.314.peg.36	CDS	hypothetical protein	ttggcaaaaaacgcggcagaaaataaaaaatccaacactcaattttacaaagtgctggatttcagaggtataaaattcagtattttttcacaaggacaaattatctccgacttaaattgtttgtaa	MAKNAAENKKSNTQFYKVLDFRGIKFSIFSQGQIISDLNCL
selected	fig|34085.314.peg.37	CDS	Bifunctional deaminase-reductase domain protein	atgggtaaagttcagattctcgccgtactgacgatggacggatgtctttcttcagagttatatgataaagcacatcaggatttgtgccttgaccgttgcggtcttgatgaaatcaggaagaaagccttttaccgtgtgacaccggactattccatttcaatgctgcacgaatggagaaaagactgcacaaacatccgttacctcgcggaagccacaccggacacggcagactatataaacggactgctgcggatgcacgctgtggatgaaatcatactatacaccgttcctttcatatccggaagcggacgacatttttttaagtcggctctgccagagcaacactggacgctttcctctttgaaaagctatcccaacggtgtatgtcgcattatctat…	MGKVQILAVLTMDGCLSSELYDKAHQDLCLDRCGLDEIRKKAFYRVTPDYSISMLHEWRKDCTNIRYLAEATPDTADYINGLLRMHAVDEIILYTVPFISGSGRHFFKSALPEQHWTLSSLKSYPNGVCRIIYILDKKAR
selected	fig|34085.314.peg.38	CDS	CTnDOT two-component system response regulator and RteC activator, RteB	atgaataagacaaaaataattgtggtggaagacaacatcgtgtattgcgaatatgtctgcaatatgctgtcacgggagggctaccgcaatatgaaggcttaccacctctcaaccgcgaagaaacatctgcaacaggcaacagataatgatatcgtggttgccgacctgcgtctgcctgacggcagtggcatagaccttttgtgctggatgcgaaaggagggaaagatgcagcccttcatcattatgaccgactacgccgaagttaataccgccgtggaaagcatgaaactcggctcgatagactatattcccaaacagcttgtggaggataaacttgtccccctgatccgttccatactgaaagaacgtcaggcaggacaacgccgtatgcctatattc…	MNKTKIIVVEDNIVYCEYVCNMLSREGYRNMKAYHLSTAKKHLQQATDNDIVVADLRLPDGSGIDLLCWMRKEGKMQPFIIMTDYAEVNTAVESMKLGSIDYIPKQLVEDKLVPLIRSILKERQAGQRRMPIFAREGSAFQKIMHRIRLVAATDMSVMIFGENGTGKEHIAHLLHDKSKRAGKPFVAVDCGSLSKELAPSAFFGHVKGAFTGADNAKKGYFHEAEGGTLFLDEVGNLALETQQMLLRAIQERRYRPVGDKADRNFNVRIIAATNEDLEVSVNEKRFRQDLLYRLHDFGITVPPLRDCQEDIMPLAEFFRDMANRELECSVSGFSSEARKALLTHAWPGNVRELRQKVMGAVLQAQEGVVMKEHLELAVTKPTSTVSFALRNDAEDKERI…
selected	fig|34085.314.peg.39	CDS	CTnDOT two-component system sensor histidine kinase RteA	gtgcaggatcgccaattgtcggaacaagccgacagccttgcagctcgtaatgcagaacttaacagacaactgcaagaattgatttgccaaatagaagaaaaggtacaaaccgaactgcaaagccgggaaaacgaaatagttgccatgcgtgaaaagtcatttatgcaagtaggcggtttaatgggattcgttcttctattgttgttaatttcctacatcatcatacatcgtgatgcaaaaagcattaaacaatacaagcacaagacaactgatttgataaggcaactggaacaatccgtacaacggaacgaggcactgataacgtcaaggaagaaggcggtacatactatcacccatgaactgcgcacaccgctgacagcaataacaggctatgccgga…	MQDRQLSEQADSLAARNAELNRQLQELICQIEEKVQTELQSRENEIVAMREKSFMQVGGLMGFVLLLLLISYIIIHRDAKSIKQYKHKTTDLIRQLEQSVQRNEALITSRKKAVHTITHELRTPLTAITGYAGLIRKEQCEDKSGQYIQNILQSSDRMRDMLNTLLDFFRLDNGKEQPRLSPCRISAITHTLETEFMPVAVNKGLSLSVKTGHDAIVLTDKERIIQIGNNLLSNAVKFTEEGGVSLITEYDNGVLTLVVEDTGTGMTEEEQKQAFGAFERLSNAAAKEGFGLGLAIMRNIVSMLGGTIRLDSKKGKGSRFTVEISMQEAEEQLGYTSNTPVYHNNKFHDVVAIDNDEVLLLMLKEMYSQEGIHCDTCTDAAALMEMIRQKEYSLLLTDL…
selected	fig|34085.314.peg.40	CDS	CTnDOT two-component system sensor histidine kinase RteA	atggagcggtcaggaaatttctataaggcaatacggttgggatatatacttatctccattcttatcggatgtatggcatataatagcctctatgaatggcaggagatagaagcattagaacttggcaataaaaaaatagacgagctccgaaaagaaataaacaatatcaatattcaaatgataaaattttctctattgggtgaaacaatactggaatggaacgataaagatatcgagcattaccatgcacggcgtatggcaatggacagtatgctctgccgtttcaaggccacctatccagcagagcgcatcgatagtgtgcgcagtcttttagaggataaggaacgacagatgttccagatagtccggttaatggatgaacaacaatctattaacaag…	MERSGNFYKAIRLGYILISILIGCMAYNSLYEWQEIEALELGNKKIDELRKEINNINIQMIKFSLLGETILEWNDKDIEHYHARRMAMDSMLCRFKATYPAERIDSVRSLLEDKERQMFQIVRLMDEQQSINKKIANQIPVIVQKSVQEQSKKPKRKGFLGIFGKKRK
selected	fig|34085.314.peg.41	CDS	Tetracycline resistance, ribosomal protection type => Tet(Q)	gtgcgtttcgacaatgcatctactgtagtatattattgcttaatccaaatgaatattataaatttaggaattcttgctcacattgatgcaggaaaaacttccgtaaccgagaatctgctgtttgccagtggagcaacggaaaagtgcggccgtgtggataatggtgacaccataacggactctatggatatagagaaacgtagaggaattactgtccgggcttctacgacatctattatctggaatggagtgaaatgcaatatcattgacactccgggacacatggattttattgcggaagtggagcggacattcaaaatgcttgatggagcagtcctcatcttatccgcaaaggaaggcatacaagcgcagacaaagttgctgttcagtactttacaa…	MRFDNASTVVYYCLIQMNIINLGILAHIDAGKTSVTENLLFASGATEKCGRVDNGDTITDSMDIEKRRGITVRASTTSIIWNGVKCNIIDTPGHMDFIAEVERTFKMLDGAVLILSAKEGIQAQTKLLFSTLQKLQIPTIIFINKIDRAGVNLERLYMDIKTNLSQDVLFMQTVVDGSVYPVCSQTYIKEEYKEFVCNHDDDILERYLADSEISPADYWNTIIALVAKAKVYPVLHGSAMFNIGINELLDAISSFILPPASVSNRLSAYLYKIEHDPKGHKRSFLKIIDGSLRLRDVVRINDSEKFIKIKNLKTIYQGREINVDEVGANDIAIVEDIEDFRIGDYLGAKPCLIQGLSHQHPALKSSVRPNKPEERSKVISALNTLWIEDPSLSFSINSY…
selected	fig|34085.314.peg.42	CDS	Putative DNA methylase	atggcgtttaaccgcaaacagaaactgcgggacaacatcgaggcgatacggacggcattcatccttgacagggaaaataggacagcgacaaccgaagagcgtgccatacttcaaaggtactgcggtttcggcggtctgaaatgtatcctcaaccctgcaaaggaactgacggatgccgtccggtgggcgaaatccgacctcgaactgttcgccccgacggtggagctgcacaggcttatccgtgagaacagcaaggacgaaacagagtacaagcggtttgtggattcgctgaaagcgtccgtgctgaccgctttctacacccccaaagagataaccgacaccatcgcggacgtgctggcagattacagcgtccgccccgcccgtatgctcgaaccgtcg…	MAFNRKQKLRDNIEAIRTAFILDRENRTATTEERAILQRYCGFGGLKCILNPAKELTDAVRWAKSDLELFAPTVELHRLIRENSKDETEYKRFVDSLKASVLTAFYTPKEITDTIADVLADYSVRPARMLEPSAGVGVFVDSMLRHSPNADVMAFEKDLLTGTILRHLYPDQKMRTCGFEKIERPFNNYFDLAVSNIPFGDIAVFDAEFQRSDSFGRRSAQKTIHNYFFLKGLDAVRDGGIVAFITSQGVLNSTKTSVRNELFSQANLVSAIRLPNNLFTDNAGTEVGSDLIVLQKNLSKKEMSQDERLMTVIQTDTKTALTDNAYFIHHPERIVHTMAKLDTDPYGKPAMVYLHEGKAAGIAGDLRRMLDEDFHYRLAMRLYSGSIRQAGTEEKVAVQ…
selected	fig|34085.314.peg.43	CDS	FIG00936811: hypothetical protein	atgaattgttcttcgataccggattacactcatactttggatttagtggtggcactcggagggataccgagtgcctttttcttcctttttccaaccgattatcccgttaattatcaatccgctaaatccaaagtaatgaacaacaagaagaaaaacgagggtcagaccgacttttcctattacggtctgtacctgctggactatctccgcacgaacaagtttgaacaggctgacgacaccgctttcatacgggaacgggccgaccgtgccgccgaaacgtatgagagggcacggcttgaaggctatcccgccgatggtgcgcaggaactggcgatggacacgctgctgcgcgggctgcattattcccgttacgccatcctccgcgaagtcgtggaaaac…	MNCSSIPDYTHTLDLVVALGGIPSAFFFLFPTDYPVNYQSAKSKVMNNKKKNEGQTDFSYYGLYLLDYLRTNKFEQADDTAFIRERADRAAETYERARLEGYPADGAQELAMDTLLRGLHYSRYAILREVVENEFADEVPEEKREAFVLKLLPLVGNVFSVYDLSDDNFALSSDYDLLYTELTGATVLYLDEYGV
selected	fig|34085.314.peg.44	CDS	DNA topoisomerase III, Bacteroidales-type (EC 5.99.1.2)	atgaagacaatcattgcagaaaagccctccgtggcacgtgaaatcgcccgcatcgtgggcgcgacaaagagagaggaaggatatttcgagggaggcggttatgccgtgacatgggcattcggacacctcgttcagcttgccatgcccgacggctacggcgtgcgcggatttgtccgtgacaacctcccgattattcccgacacattcacgctcgtcccccgtcaggtcaggacggagaaaggttacaagcccgacagcggcgtggtgtcgcagataaaagtcatcaaaagactgttcgacacaagcgaacatatcatcgtggcgaccgatgccggacgcgagggagagcttatcttccgctacctctaccactatacgggttgcaccactcctttcgtg…	MKTIIAEKPSVAREIARIVGATKREEGYFEGGGYAVTWAFGHLVQLAMPDGYGVRGFVRDNLPIIPDTFTLVPRQVRTEKGYKPDSGVVSQIKVIKRLFDTSEHIIVATDAGREGELIFRYLYHYTGCTTPFVRLWISSLTDKAIREGLRKLEDGSKYDNLYLAAKARSESDWLVGINGTQALSIAAGHGTYSVGRVQTPTLAMVCERYWENRRFTSEAFWQLHIATDGCDGEVVKFSSSEKWKEKEPAMELYNKVKAAGCATVTKAERKEKTEETPLLYDLTTLQKEANAKHGFTAEQTLEIAQKLYEKKLITYPRTGSRYIPEDVFAEIPKLLAFIGTQPEWKDKVRAKAAPTRRSADDGKVTDHHALLVTGEKPLFLSKEDNTIYQMIAGRMVEAF…
selected	fig|34085.314.peg.45	CDS	FIG00937566: hypothetical protein	atggcaaagaaaaaagacgaaaaggacgtgctggtagtccgtgacgagaagacaggcgagatcagcgtggtagccgggctgaacgcggacggcacacccaagcgcacccccgcaaaagcggagaacgcgcagagtttcctgcaattcgaccgacatggcgacgtgctggacaacttcttcaagaacttcttccggcagtgcaaggagcccagccgcttcggtttctaccgcattgcggcagaccaagctgaaaatctcttagaggtgatgaagcaactgctgaaagaccccgaagcgaacaaggagctgctcgcccctcacaaggtggacacctccgactatgagaagaaggtgcaggaagagatggcagcacaacagacagagaaacaagaacctcaa…	MAKKKDEKDVLVVRDEKTGEISVVAGLNADGTPKRTPAKAENAQSFLQFDRHGDVLDNFFKNFFRQCKEPSRFGFYRIAADQAENLLEVMKQLLKDPEANKELLAPHKVDTSDYEKKVQEEMAAQQTEKQEPQKQENMEQRKEQQQDKSEQMQGKRGYQPIDESKINWQELEDRWGVKRDNLEKSGDLTKMLNYGKSDLVKVKPTFGGESFELDARLSFKKDGEGNISLVPHFIRKEQKLDEYKEHKFSDNDRKNLRETGNLGRVVDIVDRETGEIIPSYISIDRKTNEITDIPASRVRIPERIGKTEITTQERDMLRAGLPVRDKLIERNDGRKFVTTLQVNVEQRGVEFVPGTGKSPRTAQTQETKGDTSKSQAQGGENAAQTKKEQRRNTWTNEDG…
selected	fig|34085.314.peg.46	CDS	FIG00938987: hypothetical protein	atggaactgctcacacgaaacaacttcgagggctggatgcagaagctgatggaacggctcgaccgtcaggacgaactgctgctggcgatgaaggctgaggggaaacagcccactatcacggaaagcatccgccttttcgacaatcaggatttgtgcatgttgctccagataagcaaacgcaccctccaacgctaccgcagcgtaggcgcattgccctacaagacgctgggcaagaagacctattacagcgaggaggacgtgctgacattcctttccaaccatatcaaggacttcaaaaaggaagatatagccttctacaaggctcgtatccataatttctttcataaataa	MELLTRNNFEGWMQKLMERLDRQDELLLAMKAEGKQPTITESIRLFDNQDLCMLLQISKRTLQRYRSVGALPYKTLGKKTYYSEEDVLTFLSNHIKDFKKEDIAFYKARIHNFFHK
selected	fig|34085.314.peg.47	CDS	FIG00936922: hypothetical protein	atgaaagtgataacaatggaaagttccgcctacaaggagatgatggcgcagattgcgaacatcgcagggtacatccgcgaggcaagggacgagaagaaacggaagcgggaaaccgaagacaagctgcttgacacggcacaggcggcgaagatgctcaacgtgagcaagcgcaccatgcagcgtatgcgcaccgaccaccgtatcgagtatgtggtggtacgcggaagctgccgctaccgcctttccgagatactgcggctattggaggacaacacagtaaggaacgaggaagggacaatagacaccctgttccacaaccacacgctgcgcacgggcggcaaaccaaaaggaaggaggacatag	MKVITMESSAYKEMMAQIANIAGYIREARDEKKRKRETEDKLLDTAQAAKMLNVSKRTMQRMRTDHRIEYVVVRGSCRYRLSEILRLLEDNTVRNEEGTIDTLFHNHTLRTGGKPKGRRT
selected	fig|34085.314.peg.48	CDS	FIG00938698: hypothetical protein	atggaaatagtatctatcgagaaaaagactttcgagatgatggtggcggcattcggcgcactctcggagaaggtcgccgccctgaggcgcaaaagcgacacggggcgcatggaaagatggctcacgggcgaggaggtctgcgggcagttgagaataagcccgcgcacgttgcagacgctgcgtgacaggcggcttatcggctactcgcagataaaccgcaggttctattacaagccagaggaggtgaagcggctgataccgcttgtcggcacgctctatccgcacggcagatga	MEIVSIEKKTFEMMVAAFGALSEKVAALRRKSDTGRMERWLTGEEVCGQLRISPRTLQTLRDRRLIGYSQINRRFYYKPEEVKRLIPLVGTLYPHGR
selected	fig|34085.314.peg.49	CDS	hypothetical protein	atgatgaacgagaacaacgatgtttttacgatggaagacgagccgatagcctctgtggtgcaggatatgcgcaaaggctcgaaatggctgtccgcatttctggaaagctaccgtcctccgctggacggggaacgttacctgacggacggcgaggtgtcggaactgctccgtgtgagccggcgcaccttgcaggaataccgcaacaaccgcgtgttgcccttcatacttttgggagggaaggtgctttacccggaaacggggctgcgcggggtactggaagcgaactaccgcaagccgctggagtga	MMNENNDVFTMEDEPIASVVQDMRKGSKWLSAFLESYRPPLDGERYLTDGEVSELLRVSRRTLQEYRNNRVLPFILLGGKVLYPETGLRGVLEANYRKPLE
selected	fig|34085.314.peg.50	CDS	hypothetical protein	atgaaacgtgacacaatcatcatcgaggacaaggcagtcagcgtaaccggtaacgacgtgtggatgaccgccaccgaaatagccggattgttccatacgaccgtcccggcagtgaacgccgccatcagagccgtccgcaagtcggacgtgctgaacgactacgaggtgtgccgctacatgcagcttgaaaacgggctgcacgcggacgtgtacgcccttgaaatcatcatcccggtcgctttcagggtgaatacctacaacacccacctgttccgcacatggctggtgggaaaggcactctcacaagagaaacggcagacatacgtgatgttcatacagaacggaaaagccgggtattgctga	MKRDTIIIEDKAVSVTGNDVWMTATEIAGLFHTTVPAVNAAIRAVRKSDVLNDYEVCRYMQLENGLHADVYALEIIIPVAFRVNTYNTHLFRTWLVGKALSQEKRQTYVMFIQNGKAGYC
selected	fig|34085.314.peg.51	CDS	Integrase => IntDOT	atgaagagtacattttcagtaatctactacctcaagcgtcaggtagtgaaaaaggacgggacagttcccgtcatgggacgcatcacggtggacggcagccagacacagttcagctgcaaactgactgtcgatccgaaactgtgggacaccaaaggtggacgtgtcacgggcagaagcacggcggcactcgaaacgaaccgtatgcttgacaagatgcgggtacgcatcaacaggcattatcaggaaatcatggagcgtgacaacttcgtcacggcggagaaggtgaagaacgcctttctcggactggaacaccgctaccacacgctgatgcaggtgttccgccagcacaacgaggactacgagaagcaggtggaggcaggcatgaaagccaaaggcacg…	MKSTFSVIYYLKRQVVKKDGTVPVMGRITVDGSQTQFSCKLTVDPKLWDTKGGRVTGRSTAALETNRMLDKMRVRINRHYQEIMERDNFVTAEKVKNAFLGLEHRYHTLMQVFRQHNEDYEKQVEAGMKAKGTLLKYRTVYKHMQEFLDIRYHVKDIALKELTPAFISDFEMFLRTDKHCCTNTVWLYVCPLRTMVFIAINNEWLTRDPFREYEIKKEETTRSFLTKDEIRLLMEGKLKNAKQELYRDLYLFCAFTGLSFADMRNLTEENIRTYFDEHEWININRQKTGVVSNIRLLDIANRIIGKYRGLCGDGRIFPVPHYNTCLAGIRAVAKRCGITKHITWHQSRHTAATTIFLSNGVPIETVSSMLGHKSIKTTQIYAKITKEKLNQDMENLAAR…

## Sheet: Islandviewer 4
Additional file 3: Table S3. Islands of RCAD0179 predicted by Islandviewer 4
Island start	Island end	Length	Method	Gene name	Gene ID	Locus	Gene start	Gene end	Strand	Product	External Annotations
1813	38557	36744	Predicted by at least one method			D1Y74_10495	903	1829	1	DNA adenine methylase
1813	38557	36744	Predicted by at least one method			D1Y74_10500	1813	2652	1	restriction endonuclease
1813	38557	36744	Predicted by at least one method			D1Y74_10505	2653	3552	1	site-specific DNA-methyltransferase
1813	38557	36744	Predicted by at least one method			D1Y74_10510	3709	4539	1	GLPGLI family protein
1813	38557	36744	Predicted by at least one method			D1Y74_10585	5906	6724	1	alpha/beta hydrolase
1813	38557	36744	Predicted by at least one method			D1Y74_10405	8674	8790	1	sel1 repeat family protein
1813	38557	36744	Predicted by at least one method			D1Y74_10410	8809	9291	1	sel1 repeat family protein
1813	38557	36744	Predicted by at least one method			D1Y74_10415	9538	10221	1	hypothetical protein
1813	38557	36744	Predicted by at least one method			D1Y74_10420	10285	10698	1	hypothetical protein
1813	38557	36744	Predicted by at least one method			D1Y74_10425	10928	11347	1	hypothetical protein
1813	38557	36744	Predicted by at least one method			D1Y74_10430	12181	13056	1	hypothetical protein
1813	38557	36744	Predicted by at least one method			D1Y74_10435	13109	13312	1	hypothetical protein
1813	38557	36744	Predicted by at least one method			D1Y74_10440	13314	13820	1	HXXEE domain-containing protein
1813	38557	36744	Predicted by at least one method			D1Y74_10445	14026	14304	1	hypothetical protein
1813	38557	36744	Predicted by at least one method			D1Y74_10450	14304	14708	1	PIN domain-containing protein
1813	38557	36744	Predicted by at least one method			D1Y74_10455	14888	15310	1	hypothetical protein
1813	38557	36744	Predicted by at least one method			D1Y74_10460	15390	16199	1	hypothetical protein
1813	38557	36744	Predicted by at least one method			D1Y74_10290	17628	17882	1	prevent-host-death protein
1813	38557	36744	Predicted by at least one method			D1Y74_10285	17882	18139	1	Txe/YoeB family addiction module toxin
1813	38557	36744	Predicted by at least one method			D1Y74_10280	18411	18665	1	hypothetical protein
1813	38557	36744	Predicted by at least one method			D1Y74_10275	18655	19086	1	PIN domain-containing protein
1813	38557	36744	Predicted by at least one method			D1Y74_10270	19254	19712	1	hypothetical protein
1813	38557	36744	Predicted by at least one method			D1Y74_10265	19955	20722	1	hypothetical protein
1813	38557	36744	Predicted by at least one method			D1Y74_10260	20743	21561	1	restriction endonuclease
1813	38557	36744	Predicted by at least one method			D1Y74_10255	21788	22276	1	hypothetical protein
1813	38557	36744	Predicted by at least one method			D1Y74_10250	22332	22511	1	hypothetical protein
1813	38557	36744	Predicted by at least one method			D1Y74_10245	22537	23592	1	hypothetical protein
1813	38557	36744	Predicted by at least one method			D1Y74_10240	23592	24542	1	DNA-binding protein
1813	38557	36744	Predicted by at least one method			D1Y74_10235	24862	25410	1	hypothetical protein
1813	38557	36744	Predicted by at least one method			D1Y74_10230	25649	26002	1	DUF4377 domain-containing protein
1813	38557	36744	Predicted by at least one method			D1Y74_10225	26038	26277	1	hypothetical protein
1813	38557	36744	Predicted by at least one method			D1Y74_10220	26717	26989	1	hypothetical protein
1813	38557	36744	Predicted by at least one method			D1Y74_10215	27163	27789	1	hypothetical protein
1813	38557	36744	Predicted by at least one method			D1Y74_10210	27896	28078	-1	hypothetical protein
1813	38557	36744	Predicted by at least one method			D1Y74_10205	28088	28495	1	hypothetical protein
1813	38557	36744	Predicted by at least one method			D1Y74_10200	28499	29092	1	hypothetical protein
1813	38557	36744	Predicted by at least one method			D1Y74_10195	29252	30640	1	AAA family ATPase
1813	38557	36744	Predicted by at least one method			D1Y74_10190	30637	32010	1	hypothetical protein
1813	38557	36744	Predicted by at least one method			D1Y74_10185	32132	32599	1	GLPGLI family protein
1813	38557	36744	Predicted by at least one method			D1Y74_10180	32810	33268	1	hypothetical protein
1813	38557	36744	Predicted by at least one method			D1Y74_10175	33328	33876	1	hypothetical protein
1813	38557	36744	Predicted by at least one method			D1Y74_10170	33901	34599	1	hypothetical protein
1813	38557	36744	Predicted by at least one method			D1Y74_10165	34649	35263	1	hypothetical protein
1813	38557	36744	Predicted by at least one method			D1Y74_10160	35306	35374	1	IS1595 family transposase
1813	38557	36744	Predicted by at least one method			D1Y74_07695	36488	36688	1	hypothetical protein
1813	38557	36744	Predicted by at least one method			D1Y74_07690	36705	37091	1	hypothetical protein
1813	38557	36744	Predicted by at least one method			D1Y74_07685	37188	37826	1	hypothetical protein
1813	38557	36744	Predicted by at least one method			D1Y74_07680	37853	38557	1	hypothetical protein
8809	15310	6501	Predicted by at least one method			D1Y74_10410	8809	9291	1	sel1 repeat family protein
8809	15310	6501	Predicted by at least one method			D1Y74_10415	9538	10221	1	hypothetical protein
8809	15310	6501	Predicted by at least one method			D1Y74_10420	10285	10698	1	hypothetical protein
8809	15310	6501	Predicted by at least one method			D1Y74_10425	10928	11347	1	hypothetical protein
8809	15310	6501	Predicted by at least one method			D1Y74_10430	12181	13056	1	hypothetical protein
8809	15310	6501	Predicted by at least one method			D1Y74_10435	13109	13312	1	hypothetical protein
8809	15310	6501	Predicted by at least one method			D1Y74_10440	13314	13820	1	HXXEE domain-containing protein
8809	15310	6501	Predicted by at least one method			D1Y74_10445	14026	14304	1	hypothetical protein
8809	15310	6501	Predicted by at least one method			D1Y74_10450	14304	14708	1	PIN domain-containing protein
8809	15310	6501	Predicted by at least one method			D1Y74_10455	14888	15310	1	hypothetical protein
22332	28495	6163	Predicted by at least one method			D1Y74_10250	22332	22511	1	hypothetical protein
22332	28495	6163	Predicted by at least one method			D1Y74_10245	22537	23592	1	hypothetical protein
22332	28495	6163	Predicted by at least one method			D1Y74_10240	23592	24542	1	DNA-binding protein
22332	28495	6163	Predicted by at least one method			D1Y74_10235	24862	25410	1	hypothetical protein
22332	28495	6163	Predicted by at least one method			D1Y74_10230	25649	26002	1	DUF4377 domain-containing protein
22332	28495	6163	Predicted by at least one method			D1Y74_10225	26038	26277	1	hypothetical protein
22332	28495	6163	Predicted by at least one method			D1Y74_10220	26717	26989	1	hypothetical protein
22332	28495	6163	Predicted by at least one method			D1Y74_10215	27163	27789	1	hypothetical protein
22332	28495	6163	Predicted by at least one method			D1Y74_10210	27896	28078	-1	hypothetical protein
22332	28495	6163	Predicted by at least one method			D1Y74_10205	28088	28495	1	hypothetical protein
121198	125257	4059	Predicted by at least one method			D1Y74_07235	121198	121656	-1	hypothetical protein
121198	125257	4059	Predicted by at least one method			D1Y74_07230	121653	122081	-1	NinG protein
121198	125257	4059	Predicted by at least one method			D1Y74_07225	122184	122498	-1	DUF2693 domain-containing protein
121198	125257	4059	Predicted by at least one method			D1Y74_07220	122561	123310	-1	phage antirepressor Ant
121198	125257	4059	Predicted by at least one method			D1Y74_07215	123313	123633	-1	hypothetical protein
121198	125257	4059	Predicted by at least one method			D1Y74_07210	124207	125031	-1	damage-inducible protein
121198	125257	4059	Predicted by at least one method			D1Y74_07205	125039	125257	-1	hypothetical protein
195330	203973	8643	Predicted by at least one method			D1Y74_06105	195330	195869	-1	ankyrin repeat domain-containing protein
195330	203973	8643	Predicted by at least one method			D1Y74_06110	195959	197489	-1	catalase
195330	203973	8643	Predicted by at least one method			D1Y74_06115	198099	198476	1	IS5 family transposase
195330	203973	8643	Predicted by at least one method			D1Y74_06120	198547	198806	1	IS1595 family transposase
195330	203973	8643	Predicted by at least one method			D1Y74_06125	198928	199221	1	hypothetical protein
195330	203973	8643	Predicted by at least one method			D1Y74_06130	199268	199729	1	hypothetical protein
195330	203973	8643	Predicted by at least one method			D1Y74_06135	199760	201928	1	hypothetical protein
195330	203973	8643	Predicted by at least one method			D1Y74_06140	201960	203408	1	RagB/SusD family nutrient uptake outer membrane protein
195330	203973	8643	Predicted by at least one method			D1Y74_06145	203476	203973	1	hypothetical protein
327209	334818	7609	Predicted by at least one method			D1Y74_06750	327209	327952	1	Fic family protein
327209	334818	7609	Predicted by at least one method			D1Y74_06755	328107	329081	1	hypothetical protein
327209	334818	7609	Predicted by at least one method			D1Y74_06760	329176	329457	1	DNA-binding protein
327209	334818	7609	Predicted by at least one method			D1Y74_06765	329575	330192	1	phage antirepressor protein
327209	334818	7609	Predicted by at least one method			D1Y74_06770	330173	330487	-1	XRE family transcriptional regulator
327209	334818	7609	Predicted by at least one method			D1Y74_06775	330642	330860	1	hypothetical protein
327209	334818	7609	Predicted by at least one method			D1Y74_06780	330869	331177	1	DUF2693 domain-containing protein
327209	334818	7609	Predicted by at least one method			D1Y74_06785	331184	331456	1	hypothetical protein
327209	334818	7609	Predicted by at least one method			D1Y74_06790	331491	332021	1	hypothetical protein
327209	334818	7609	Predicted by at least one method			D1Y74_06795	332188	332610	1	hypothetical protein
327209	334818	7609	Predicted by at least one method			D1Y74_06800	332673	334055	1	hypothetical protein
327209	334818	7609	Predicted by at least one method			D1Y74_06805	334534	334818	1	hypothetical protein
994933	1045767	50834	Predicted by at least one method			D1Y74_04785	994933	996696	-1	arginine--tRNA ligase
994933	1045767	50834	Predicted by at least one method			D1Y74_04780	996700	996930	-1	hypothetical protein
994933	1045767	50834	Predicted by at least one method			D1Y74_04775	997046	998281	1	site-specific integrase
994933	1045767	50834	Predicted by at least one method			D1Y74_04770	998293	998655	1	RhuM protein
994933	1045767	50834	Predicted by at least one method			D1Y74_04765	998733	999038	-1	DNA-binding protein
994933	1045767	50834	Predicted by at least one method			D1Y74_04760	999070	999369	-1	DNA-binding protein
994933	1045767	50834	Predicted by at least one method			D1Y74_04755	999375	999572	-1	hypothetical protein
994933	1045767	50834	Predicted by at least one method			D1Y74_04750	999571	999933	1	DNA-binding protein
994933	1045767	50834	Predicted by at least one method			D1Y74_04745	999937	1000287	1	DNA-binding protein
994933	1045767	50834	Predicted by at least one method			D1Y74_04740	1000308	1001879	1	DUF4099 domain-containing protein
994933	1045767	50834	Predicted by at least one method			D1Y74_04735	1001940	1004027	1	type IA DNA topoisomerase
994933	1045767	50834	Predicted by at least one method			D1Y74_04730	1004055	1004642	1	DUF1896 domain-containing protein
994933	1045767	50834	Predicted by at least one method			D1Y74_04725	1004632	1010448	1	DNA methylase
994933	1045767	50834	Predicted by at least one method		tet(Q)	D1Y74_04720	1011106	1013031	1	tetracycline resistance ribosomal protection protein Tet(Q)
994933	1045767	50834	Predicted by at least one method			D1Y74_04715	1013031	1013599	1	hypothetical protein
994933	1045767	50834	Predicted by at least one method			D1Y74_04710	1013600	1015348	1	hybrid sensor histidine kinase/response regulator
994933	1045767	50834	Predicted by at least one method			D1Y74_04705	1015341	1016663	1	sigma-54-dependent Fis family transcriptional regulator
994933	1045767	50834	Predicted by at least one method			D1Y74_04700	1016943	1017365	1	deaminase
994933	1045767	50834	Predicted by at least one method			D1Y74_04695	1017604	1018209	1	RteC protein
994933	1045767	50834	Predicted by at least one method			D1Y74_04690	1018511	1019641	1	ATP-binding protein
994933	1045767	50834	Predicted by at least one method			D1Y74_04685	1019658	1022912	1	NTPase
994933	1045767	50834	Predicted by at least one method			D1Y74_04680	1023044	1025062	-1	conjugal transfer protein TraG
994933	1045767	50834	Predicted by at least one method			D1Y74_04675	1025093	1026340	-1	relaxase
994933	1045767	50834	Predicted by at least one method			D1Y74_04670	1026319	1026747	-1	MobA protein
994933	1045767	50834	Predicted by at least one method			D1Y74_04665	1026744	1026968	-1	hypothetical protein
994933	1045767	50834	Predicted by at least one method			D1Y74_04660	1027017	1027184	-1	hypothetical protein
994933	1045767	50834	Predicted by at least one method			D1Y74_04655	1027169	1028218	1	ParA family protein
994933	1045767	50834	Predicted by at least one method			D1Y74_04650	1028221	1028661	1	DUF3408 domain-containing protein
994933	1045767	50834	Predicted by at least one method			D1Y74_04645	1028664	1029017	1	DUF3408 domain-containing protein
994933	1045767	50834	Predicted by at least one method			D1Y74_04640	1029034	1029762	1	conjugal transfer protein TraD
994933	1045767	50834	Predicted by at least one method			D1Y74_04635	1029964	1030281	1	DUF4134 domain-containing protein
994933	1045767	50834	Predicted by at least one method			D1Y74_04630	1030292	1030624	1	DUF4133 domain-containing protein
994933	1045767	50834	Predicted by at least one method		traG	D1Y74_04625	1030621	1033125	1	TraG family conjugative transposon ATPase
994933	1045767	50834	Predicted by at least one method			D1Y74_04620	1033166	1033546	1	DUF3876 domain-containing protein
994933	1045767	50834	Predicted by at least one method			D1Y74_04615	1033570	1034199	1	DUF4141 domain-containing protein
994933	1045767	50834	Predicted by at least one method		traJ	D1Y74_04610	1034203	1035207	1	conjugative transposon protein TraJ
994933	1045767	50834	Predicted by at least one method		traK	D1Y74_04605	1035239	1036177	1	conjugative transposon protein TraK
994933	1045767	50834	Predicted by at least one method		traM	D1Y74_04600	1036158	1037510	1	conjugative transposon protein TraM
994933	1045767	50834	Predicted by at least one method		traN	D1Y74_04595	1037545	1038531	1	conjugative transposon protein TraN
994933	1045767	50834	Predicted by at least one method			D1Y74_04590	1038534	1039109	1	conjugal transfer protein TraO
994933	1045767	50834	Predicted by at least one method			D1Y74_04585	1039117	1040019	1	DNA primase
994933	1045767	50834	Predicted by at least one method			D1Y74_04580	1040016	1040519	1	DUF3872 domain-containing protein
994933	1045767	50834	Predicted by at least one method			D1Y74_04575	1040516	1041043	1	lysozyme
994933	1045767	50834	Predicted by at least one method			D1Y74_04570	1041252	1041497	1	hypothetical protein
994933	1045767	50834	Predicted by at least one method			D1Y74_04565	1041531	1041839	-1	hypothetical protein
994933	1045767	50834	Predicted by at least one method			D1Y74_04560	1041893	1042138	-1	hypothetical protein
994933	1045767	50834	Predicted by at least one method			D1Y74_04555	1042135	1042368	-1	DUF3873 domain-containing protein
994933	1045767	50834	Predicted by at least one method			D1Y74_04550	1042388	1042645	-1	hypothetical protein
994933	1045767	50834	Predicted by at least one method			D1Y74_04545	1042670	1044001	-1	hypothetical protein
994933	1045767	50834	Predicted by at least one method			D1Y74_04540	1043998	1044414	-1	PcfK-like protein
994933	1045767	50834	Predicted by at least one method			D1Y74_04535	1044428	1044649	-1	hypothetical protein
994933	1045767	50834	Predicted by at least one method			D1Y74_04530	1044661	1044876	-1	hypothetical protein
994933	1045767	50834	Predicted by at least one method			D1Y74_04525	1044782	1045026	1	hypothetical protein
994933	1045767	50834	Predicted by at least one method			D1Y74_04520	1045038	1045448	-1	hypothetical protein
994933	1045767	50834	Predicted by at least one method			D1Y74_04515	1045546	1045767	1	hypothetical protein
996700	1019641	22941	Predicted by at least one method			D1Y74_04780	996700	996930	-1	hypothetical protein
996700	1019641	22941	Predicted by at least one method			D1Y74_04775	997046	998281	1	site-specific integrase
996700	1019641	22941	Predicted by at least one method			D1Y74_04770	998293	998655	1	RhuM protein
996700	1019641	22941	Predicted by at least one method			D1Y74_04765	998733	999038	-1	DNA-binding protein
996700	1019641	22941	Predicted by at least one method			D1Y74_04760	999070	999369	-1	DNA-binding protein
996700	1019641	22941	Predicted by at least one method			D1Y74_04755	999375	999572	-1	hypothetical protein
996700	1019641	22941	Predicted by at least one method			D1Y74_04750	999571	999933	1	DNA-binding protein
996700	1019641	22941	Predicted by at least one method			D1Y74_04745	999937	1000287	1	DNA-binding protein
996700	1019641	22941	Predicted by at least one method			D1Y74_04740	1000308	1001879	1	DUF4099 domain-containing protein
996700	1019641	22941	Predicted by at least one method			D1Y74_04735	1001940	1004027	1	type IA DNA topoisomerase
996700	1019641	22941	Predicted by at least one method			D1Y74_04730	1004055	1004642	1	DUF1896 domain-containing protein
996700	1019641	22941	Predicted by at least one method			D1Y74_04725	1004632	1010448	1	DNA methylase
996700	1019641	22941	Predicted by at least one method		tet(Q)	D1Y74_04720	1011106	1013031	1	tetracycline resistance ribosomal protection protein Tet(Q)
996700	1019641	22941	Predicted by at least one method			D1Y74_04715	1013031	1013599	1	hypothetical protein
996700	1019641	22941	Predicted by at least one method			D1Y74_04710	1013600	1015348	1	hybrid sensor histidine kinase/response regulator
996700	1019641	22941	Predicted by at least one method			D1Y74_04705	1015341	1016663	1	sigma-54-dependent Fis family transcriptional regulator
996700	1019641	22941	Predicted by at least one method			D1Y74_04700	1016943	1017365	1	deaminase
996700	1019641	22941	Predicted by at least one method			D1Y74_04695	1017604	1018209	1	RteC protein
996700	1019641	22941	Predicted by at least one method			D1Y74_04690	1018511	1019641	1	ATP-binding protein
1023044	1045767	22723	Predicted by at least one method			D1Y74_04680	1023044	1025062	-1	conjugal transfer protein TraG
1023044	1045767	22723	Predicted by at least one method			D1Y74_04675	1025093	1026340	-1	relaxase
1023044	1045767	22723	Predicted by at least one method			D1Y74_04670	1026319	1026747	-1	MobA protein
1023044	1045767	22723	Predicted by at least one method			D1Y74_04665	1026744	1026968	-1	hypothetical protein
1023044	1045767	22723	Predicted by at least one method			D1Y74_04660	1027017	1027184	-1	hypothetical protein
1023044	1045767	22723	Predicted by at least one method			D1Y74_04655	1027169	1028218	1	ParA family protein
1023044	1045767	22723	Predicted by at least one method			D1Y74_04650	1028221	1028661	1	DUF3408 domain-containing protein
1023044	1045767	22723	Predicted by at least one method			D1Y74_04645	1028664	1029017	1	DUF3408 domain-containing protein
1023044	1045767	22723	Predicted by at least one method			D1Y74_04640	1029034	1029762	1	conjugal transfer protein TraD
1023044	1045767	22723	Predicted by at least one method			D1Y74_04635	1029964	1030281	1	DUF4134 domain-containing protein
1023044	1045767	22723	Predicted by at least one method			D1Y74_04630	1030292	1030624	1	DUF4133 domain-containing protein
1023044	1045767	22723	Predicted by at least one method		traG	D1Y74_04625	1030621	1033125	1	TraG family conjugative transposon ATPase
1023044	1045767	22723	Predicted by at least one method			D1Y74_04620	1033166	1033546	1	DUF3876 domain-containing protein
1023044	1045767	22723	Predicted by at least one method			D1Y74_04615	1033570	1034199	1	DUF4141 domain-containing protein
1023044	1045767	22723	Predicted by at least one method		traJ	D1Y74_04610	1034203	1035207	1	conjugative transposon protein TraJ
1023044	1045767	22723	Predicted by at least one method		traK	D1Y74_04605	1035239	1036177	1	conjugative transposon protein TraK
1023044	1045767	22723	Predicted by at least one method		traM	D1Y74_04600	1036158	1037510	1	conjugative transposon protein TraM
1023044	1045767	22723	Predicted by at least one method		traN	D1Y74_04595	1037545	1038531	1	conjugative transposon protein TraN
1023044	1045767	22723	Predicted by at least one method			D1Y74_04590	1038534	1039109	1	conjugal transfer protein TraO
1023044	1045767	22723	Predicted by at least one method			D1Y74_04585	1039117	1040019	1	DNA primase
1023044	1045767	22723	Predicted by at least one method			D1Y74_04580	1040016	1040519	1	DUF3872 domain-containing protein
1023044	1045767	22723	Predicted by at least one method			D1Y74_04575	1040516	1041043	1	lysozyme
1023044	1045767	22723	Predicted by at least one method			D1Y74_04570	1041252	1041497	1	hypothetical protein
1023044	1045767	22723	Predicted by at least one method			D1Y74_04565	1041531	1041839	-1	hypothetical protein
1023044	1045767	22723	Predicted by at least one method			D1Y74_04560	1041893	1042138	-1	hypothetical protein
1023044	1045767	22723	Predicted by at least one method			D1Y74_04555	1042135	1042368	-1	DUF3873 domain-containing protein
1023044	1045767	22723	Predicted by at least one method			D1Y74_04550	1042388	1042645	-1	hypothetical protein
1023044	1045767	22723	Predicted by at least one method			D1Y74_04545	1042670	1044001	-1	hypothetical protein
1023044	1045767	22723	Predicted by at least one method			D1Y74_04540	1043998	1044414	-1	PcfK-like protein
1023044	1045767	22723	Predicted by at least one method			D1Y74_04535	1044428	1044649	-1	hypothetical protein
1023044	1045767	22723	Predicted by at least one method			D1Y74_04530	1044661	1044876	-1	hypothetical protein
1023044	1045767	22723	Predicted by at least one method			D1Y74_04525	1044782	1045026	1	hypothetical protein
1023044	1045767	22723	Predicted by at least one method			D1Y74_04520	1045038	1045448	-1	hypothetical protein
1023044	1045767	22723	Predicted by at least one method			D1Y74_04515	1045546	1045767	1	hypothetical protein
1257041	1267614	10573	Predicted by at least one method			D1Y74_05295	1257041	1257502	1	hypothetical protein
1257041	1267614	10573	Predicted by at least one method			D1Y74_05290	1257528	1264274	1	hypothetical protein
1257041	1267614	10573	Predicted by at least one method			D1Y74_05285	1264318	1264385	1	IS1595 family transposase
1257041	1267614	10573	Predicted by at least one method			D1Y74_08720	1265516	1265734	1	hypothetical protein
1257041	1267614	10573	Predicted by at least one method			D1Y74_08715	1265728	1266237	1	hypothetical protein
1257041	1267614	10573	Predicted by at least one method			D1Y74_08710	1266244	1266525	1	hypothetical protein
1257041	1267614	10573	Predicted by at least one method			D1Y74_08705	1266519	1267061	1	hypothetical protein
1257041	1267614	10573	Predicted by at least one method			D1Y74_08700	1267150	1267614	1	serum amyloid a protein
1557550	1573096	15546	Predicted by at least one method			D1Y74_00345	1557550	1557909	-1	recombinase
1557550	1573096	15546	Predicted by at least one method			D1Y74_00350	1557821	1558024	1	hypothetical protein
1557550	1573096	15546	Predicted by at least one method			D1Y74_00355	1558196	1558627	-1	hypothetical protein
1557550	1573096	15546	Predicted by at least one method			D1Y74_00360	1558697	1558876	-1	hypothetical protein
1557550	1573096	15546	Predicted by at least one method			D1Y74_00365	1558996	1559385	-1	hypothetical protein
1557550	1573096	15546	Predicted by at least one method			D1Y74_00370	1559433	1560329	-1	hypothetical protein
1557550	1573096	15546	Predicted by at least one method			D1Y74_00375	1560381	1561484	-1	hypothetical protein
1557550	1573096	15546	Predicted by at least one method			D1Y74_00380	1561570	1561797	1	XRE family transcriptional regulator
1557550	1573096	15546	Predicted by at least one method			D1Y74_00385	1562057	1562443	-1	hypothetical protein
1557550	1573096	15546	Predicted by at least one method			D1Y74_00390	1562997	1566041	1	hypothetical protein
1557550	1573096	15546	Predicted by at least one method			D1Y74_00395	1566044	1566685	1	hypothetical protein
1557550	1573096	15546	Predicted by at least one method			D1Y74_00400	1566693	1567898	-1	DUF3871 family protein
1557550	1573096	15546	Predicted by at least one method			D1Y74_00405	1567876	1568763	-1	AAA family ATPase
1557550	1573096	15546	Predicted by at least one method			D1Y74_00410	1569201	1571837	-1	restriction endonuclease subunit R
1557550	1573096	15546	Predicted by at least one method			D1Y74_00415	1571888	1573096	-1	site-specific integrase
1843981	1865246	21265	Predicted by at least one method			D1Y74_08945	1843981	1844856	1	integrase
1843981	1865246	21265	Predicted by at least one method		raiA	D1Y74_08950	1844884	1845174	1	ribosome-associated translation inhibitor RaiA
1843981	1865246	21265	Predicted by at least one method			D1Y74_08975	1845829	1846851	1	quinone-dependent dihydroorotate dehydrogenase
1843981	1865246	21265	Predicted by at least one method		tuf	D1Y74_08980	1847025	1848212	1	elongation factor Tu
1843981	1865246	21265	Predicted by at least one method		secE	D1Y74_08990	1848382	1848588	1	preprotein translocase subunit SecE
1843981	1865246	21265	Predicted by at least one method		nusG	D1Y74_08995	1848608	1849150	1	transcription termination/antitermination factor NusG
1843981	1865246	21265	Predicted by at least one method		rplK	D1Y74_09000	1849378	1849821	1	50S ribosomal protein L11
1843981	1865246	21265	Predicted by at least one method			D1Y74_09005	1849833	1850525	1	50S ribosomal protein L1
1843981	1865246	21265	Predicted by at least one method			D1Y74_09010	1850539	1851042	1	50S ribosomal protein L10
1843981	1865246	21265	Predicted by at least one method			D1Y74_09015	1851116	1851484	1	50S ribosomal protein L7/L12
1843981	1865246	21265	Predicted by at least one method			D1Y74_09020	1851625	1853133	1	thrombospondin
1843981	1865246	21265	Predicted by at least one method			D1Y74_09025	1853149	1853711	1	hypothetical protein
1843981	1865246	21265	Predicted by at least one method			D1Y74_09030	1853779	1854303	1	hypothetical protein
1843981	1865246	21265	Predicted by at least one method			D1Y74_09035	1854339	1855682	1	hypothetical protein
1843981	1865246	21265	Predicted by at least one method			D1Y74_09040	1855741	1856307	1	hypothetical protein
1843981	1865246	21265	Predicted by at least one method		rpoB	D1Y74_09045	1856677	1860504	1	DNA-directed RNA polymerase subunit beta
1843981	1865246	21265	Predicted by at least one method		rpoC	D1Y74_09050	1860587	1864855	1	DNA-directed RNA polymerase subunit beta'
1843981	1865246	21265	Predicted by at least one method			D1Y74_09055	1864938	1865246	1	DUF3467 domain-containing protein
1947445	1971674	24229	Predicted by at least one method			D1Y74_02585	1947209	1947478	-1	hypothetical protein
1947445	1971674	24229	Predicted by at least one method			D1Y74_02580	1947445	1948122	1	TIGR02117 family protein
1947445	1971674	24229	Predicted by at least one method			D1Y74_02575	1948126	1948956	-1	M23 family metallopeptidase
1947445	1971674	24229	Predicted by at least one method			D1Y74_02570	1949162	1949857	1	hypothetical protein
1947445	1971674	24229	Predicted by at least one method			D1Y74_02565	1949882	1950616	1	PorT family protein
1947445	1971674	24229	Predicted by at least one method			D1Y74_02560	1950629	1952581	1	T9SS C-terminal target domain-containing protein
1947445	1971674	24229	Predicted by at least one method			D1Y74_02555	1952581	1961718	1	hypothetical protein
1947445	1971674	24229	Predicted by at least one method			D1Y74_02550	1961727	1961984	1	hypothetical protein
1947445	1971674	24229	Predicted by at least one method			D1Y74_02545	1962125	1962823	1	IS1 family transposase
1947445	1971674	24229	Predicted by at least one method			D1Y74_02540	1962833	1963030	1	hypothetical protein
1947445	1971674	24229	Predicted by at least one method			D1Y74_02535	1963342	1968153	-1	AAA family ATPase
1947445	1971674	24229	Predicted by at least one method			D1Y74_02530	1968249	1970261	-1	flotillin family protein
1947445	1971674	24229	Predicted by at least one method			D1Y74_02525	1970313	1970966	-1	hypothetical protein
1947445	1971674	24229	Predicted by at least one method			D1Y74_02520	1970973	1971674	-1	PspA/IM30 family protein
2097149	2101920	4771	Predicted by at least one method			D1Y74_01885	2097149	2097487	1	DNA-binding protein
2097149	2101920	4771	Predicted by at least one method			D1Y74_01880	2097938	2101207	1	DEAD/DEAH box helicase
2097149	2101920	4771	Predicted by at least one method			D1Y74_01875	2101255	2101920	1	hypothetical protein
2189171	2233346	44175	Predicted by at least one method		tet(X)	D1Y74_01525	2189171	2190337	1	tetracycline-inactivating monooxygenase Tet(X)
2189171	2233346	44175	Predicted by at least one method			D1Y74_01520	2190540	2190753	1	hypothetical protein
2189171	2233346	44175	Predicted by at least one method			D1Y74_10360	2194161	2195009	1	GLPGLI family protein
2189171	2233346	44175	Predicted by at least one method			D1Y74_10365	2195941	2196312	1	hypothetical protein
2189171	2233346	44175	Predicted by at least one method			D1Y74_10370	2196404	2197267	1	DUF3347 domain-containing protein
2189171	2233346	44175	Predicted by at least one method			D1Y74_10375	2197268	2197825	1	AraC family transcriptional regulator
2189171	2233346	44175	Predicted by at least one method			D1Y74_10380	2197919	2198632	1	heavy-metal-associated domain-containing protein
2189171	2233346	44175	Predicted by at least one method			D1Y74_10385	2198648	2200876	1	copper oxidase
2189171	2233346	44175	Predicted by at least one method			D1Y74_10390	2201224	2201565	1	type II toxin-antitoxin system RelE/ParE family toxin
2189171	2233346	44175	Predicted by at least one method			D1Y74_10395	2201546	2201851	1	XRE family transcriptional regulator
2189171	2233346	44175	Predicted by at least one method			D1Y74_10400	2201835	2202050	-1	hypothetical protein
2189171	2233346	44175	Predicted by at least one method			D1Y74_10605	2209346	2209879	1	hypothetical protein
2189171	2233346	44175	Predicted by at least one method			D1Y74_10595	2211439	2211888	-1	AraC family transcriptional regulator
2189171	2233346	44175	Predicted by at least one method		tet(X)	D1Y74_10560	2213176	2214342	-1	tetracycline-inactivating monooxygenase Tet(X)
2189171	2233346	44175	Predicted by at least one method		blaOXA	D1Y74_10565	2214496	2215317	-1	class D beta-lactamase
2189171	2233346	44175	Predicted by at least one method			D1Y74_10610	2216527	2217249	1	hypothetical protein
2189171	2233346	44175	Predicted by at least one method			D1Y74_10545	2218589	2219452	1	aminoglycoside 6-adenylyltransferase AadS
2189171	2233346	44175	Predicted by at least one method		ere(D)	D1Y74_10550	2219655	2220881	-1	EreD family erythromycin esterase
2189171	2233346	44175	Predicted by at least one method		tet(X)	D1Y74_10555	2221242	2222408	1	tetracycline-inactivating monooxygenase Tet(X)
2189171	2233346	44175	Predicted by at least one method			D1Y74_10590	2225087	2225884	1	cation transporter
2189171	2233346	44175	Predicted by at least one method			D1Y74_10615	2227149	2227814	-1	IS1595-like element ISRan1 family transposase
2189171	2233346	44175	Predicted by at least one method			D1Y74_10515	2228996	2230030	1	(p)ppGpp synthetase
2189171	2233346	44175	Predicted by at least one method			D1Y74_10520	2230337	2230681	1	type II toxin-antitoxin system RelE/ParE family toxin
2189171	2233346	44175	Predicted by at least one method			D1Y74_10525	2230683	2231009	1	XRE family transcriptional regulator
2189171	2233346	44175	Predicted by at least one method			D1Y74_10530	2231232	2231864	1	DUF4240 domain-containing protein
2189171	2233346	44175	Predicted by at least one method			D1Y74_10535	2232032	2232586	1	hypothetical protein
2189171	2233346	44175	Predicted by at least one method			D1Y74_10540	2232801	2233346	1	hypothetical protein
2225087	2231009	5922	Predicted by at least one method			D1Y74_10590	2225087	2225884	1	cation transporter
2225087	2231009	5922	Predicted by at least one method			D1Y74_10615	2227149	2227814	-1	IS1595-like element ISRan1 family transposase
2225087	2231009	5922	Predicted by at least one method			D1Y74_10515	2228996	2230030	1	(p)ppGpp synthetase
2225087	2231009	5922	Predicted by at least one method			D1Y74_10520	2230337	2230681	1	type II toxin-antitoxin system RelE/ParE family toxin
2225087	2231009	5922	Predicted by at least one method			D1Y74_10525	2230683	2231009	1	XRE family transcriptional regulator
